# Supplementary material for: Characterization of Three Heat Shock Protein Genes in Pieris melete and Their Expression Patterns in Response to Temperature Stress and Pupal Diapause
Source: MDPI journal article supplement (doi:10.3390/insects13050430), 2022-05-05
Supplement: s1 [file s1]

## Supplementary Tables and Figures

**Table S1.** Primers used in RT-PCR, RACE or qRT-PCR.

| <b>Primer name</b>    | <b>Primers nucleotide sequence (5' to 3')</b> |
|-----------------------|-----------------------------------------------|
| <i>Actin</i> -F       | CATCTACGAGGGTTACGC                            |
| <i>Actin</i> -R       | CATCTGTTGGAAGGTGGA                            |
| <i>PmHsc70</i> 3'F1   | TAACACGACCATCCCCACCAAGCA                      |
| <i>PmHsc70</i> 3'F2   | CCCAGACTTTTACGACCTATTCCGACA                   |
| <i>PmHsc70</i> 5'R1   | CGGGTTGGTTGTTCGGAATAGGTCG                     |
| <i>PmHsc70</i> 5'R2   | GCCTCGTCAGGGTTGATGGACTTGTT                    |
| <i>PmHsc70</i> 5'R3   | ACCTCCCAAGTGAGTGTCTCCAGCAGT                   |
| <i>PmHsp70a</i> 3'F1  | GCTGAGGCGTATTTGGGTAGTTCGGTC                   |
| <i>PmHsp70a</i> 3'F2  | TCTACACCAGGGTTTCTCGGGCACG                     |
| <i>PmHsp70a</i> 5'R1  | AGCGTCTATTTCAATGGTGGCTTCCGT                   |
| <i>PmHsp70a</i> 5'R2  | CAGCGTCTCTGACCGAACTACCCAAAT                   |
| <i>PmHsp70b</i> 3'F1  | CGCCGCTGTCACTTGGCATAGAACTG                    |
| <i>PmHsp70b</i> 3'F2  | GAATGCTGGCAGAGGCTGAACGATACA                   |
| <i>PmHsp70b</i> 5'R1  | ATTCCAGCAATAACCCCAGCATCCTT                    |
| <i>PmHsp70b</i> 5'R2  | TGAAATAGGCGGGCACTGTGACGAC                     |
| <i>PmHsp70b</i> 5'R3  | GATGGTGTGTTGTTTCGGTTGCCCTGGT                  |
| <i>PmHsc70</i> ORF F  | GTGATAGAAACAACTATACGC                         |
| <i>PmHsc70</i> ORF R  | TAATTGAGAGGATTACATCGAG                        |
| <i>PmHsp70a</i> ORF F | AGCGAATACTAAACAAGTGG                          |
| <i>PmHsp70a</i> ORF R | AGTACATGATCATGGATTGC                          |
| <i>PmHsp70b</i> ORF F | CAGTGATATTGTTTATCAGAAG                        |
| <i>PmHsp70b</i> ORF R | CATATGTTTTTAACACTGCAGTC                       |
| <i>PmActin</i> F      | CAGGGAAAAGATGACCCAGA                          |
| <i>PmActin</i> R      | GCAGAGCGTAACCCTCGTAG                          |
| <i>Pm18S</i> F        | AATGCCGCTTGAATATTTTCG                         |
| <i>Pm18S</i> R        | TTTCGCTGATGTTCGTCTTG                          |
| <i>PmHsp70a</i> F     | TCCGCGAGGAGTACCTAAGA                          |
| <i>PmHsp70a</i> R     | GGCTTCAGCCAACATACGAT                          |
| <i>PmHsp70b</i> F     | CGCTGTCACTTGGCATAGAA                          |
| <i>PmHsp70b</i> R     | TACAGCAGGCTGGTTGTCAG                          |
| <i>PmHsc70</i> F      | TGCTGGAGACACTCACTTGG                          |
| <i>PmHsc70</i> R      | TTCAATGCTAGCCTGTGTCTG                         |

Table S2. ANOVA results for the differential relative mRNA levels of *PmHsc70*, *PmHsp70a*, and *PmHsp70b* in response to 0°C cryogenic chilling for different duration in non-diapause (ND), summer diapause (SD), and winter diapause (WD) pupae of *P. melete*.

| Gene            | Source                       | df | MS     | F      | Sig.   |
|-----------------|------------------------------|----|--------|--------|--------|
| <i>PmHsc70</i>  | Type of Diapause/nondiapause | 2  | 89.221 | 61.06  | 0.0000 |
|                 | Duration of chilling         | 3  | 2.463  | 1.69   | 0.1967 |
|                 | Type of diapause * Duration  | 6  | 3.364  | 2.30   | 0.0675 |
| <i>PmHsp70a</i> | Type of Diapause/nondiapause | 2  | 1.179  | 173.31 | 0.0000 |
|                 | Duration of chilling         | 3  | 1.940  | 285.09 | 0.0000 |
|                 | Type of diapause * Duration  | 6  | 0.581  | 85.320 | 0.0000 |
| <i>PmHsp70b</i> | Type of Diapause/nondiapause | 2  | 0.554  | 51.72  | 0.0000 |
|                 | Duration of chilling         | 3  | 1.208  | 112.74 | 0.0000 |
|                 | Type of diapause * Duration  | 6  | 0.219  | 20.42  | 0.0000 |

Table S3. ANOVA results for the differential relative mRNA levels of *PmHsc70*, *PmHsp70a*, and *PmHsp70b* in response to different heat stress temperatures in non-diapause (ND), summer diapause (SD), and winter diapause (WD) pupae of *P. melete*.

| Gene            | Source                         | df | MS         | F      | Sig.   |
|-----------------|--------------------------------|----|------------|--------|--------|
| <i>PmHsc70</i>  | Type of Diapause/nondiapause   | 2  | 115701.732 | 427.04 | 0.0000 |
|                 | Temperature                    | 4  | 27773.736  | 102.51 | 0.0000 |
|                 | Type of diapause * Temperature | 8  | 24349.575  | 89.87  | 0.0000 |
| <i>PmHsp70a</i> | Type of Diapause/nondiapause   | 2  | 465025.497 | 147.22 | 0.0000 |
|                 | Temperature                    | 4  | 91058.6437 | 28.83  | 0.0000 |
|                 | Type of diapause * Temperature | 8  | 110894.094 | 35.11  | 0.0000 |
| <i>PmHsp70b</i> | Type of Diapause/nondiapause   | 2  | 71344.563  | 100.69 | 0.0000 |
|                 | Temperature                    | 4  | 25683.945  | 36.25  | 0.0000 |
|                 | Type of diapause * Temperature | 8  | 24889.397  | 35.13  | 0.0000 |

Table S4. ANOVA results for the differential relative mRNA levels of *PmHsc70*, *PmHsp70a*, and *PmHsp70b* in response to 39°C heat stress at different time procedures in non-diapause (ND), summer diapause (SD), and winter diapause (WD) pupae of *P. melete*.

| Gene            | Source                            | df | MS         | F      | Sig.   |
|-----------------|-----------------------------------|----|------------|--------|--------|
| <i>PmHsc70</i>  | Type of Diapause/nondiapause      | 2  | 11621.189  | 145.18 | 0.0000 |
|                 | Hours at 39 °C                    | 4  | 30762.762  | 384.32 | 0.0000 |
|                 | Type of diapause * Hours at 39 °C | 8  | 11545.736  | 144.24 | 0.0000 |
| <i>PmHsp70a</i> | Type of Diapause/nondiapause      | 2  | 109542.901 | 41.39  | 0.0000 |
|                 | Hours at 39 °C                    | 4  | 110593.749 | 41.79  | 0.0000 |
|                 | Type of diapause * Hours at 39 °C | 8  | 118227.429 | 44.67  | 0.0000 |
| <i>PmHsp70b</i> | Type of Diapause/nondiapause      | 2  | 31874.158  | 46.78  | 0.0000 |
|                 | Hours at 39 °C                    | 4  | 28642.747  | 42.04  | 0.0000 |
|                 | Type of diapause * Hours at 39 °C | 8  | 29046.4764 | 42.63  | 0.0000 |

1 TGATAATTCTTTTGAAGTGATAGAAAACAACTATACGCAATGACTACTAAAAACCAGCGGTAGGTATTGACTTGGGTACCACATACTCG

1 M T T K T P A V G I D L G T T Y S

91 TCGGTGGCGGTGTTCAGTACGGTAAGGTGGAGATCATCGCCAACGATCAGGGCAACAGGACTACACCTTCATATGTTGCCCTTCACAGAC

31 C V G V F Q Y G K V E I I A N D Q G N R T T P S Y V A F T D

181 ACCGAACGTCTCATCGGAGATGCCGCCAAGAACCAGGTGGCCCTGAACCCAAACACCATCTTTGATGCCAAACGTCTCATCGGGCGT

61 T E R L I G D A A K N Q V A L N P N N T I F D A K R L I G R

271 AAGTTCGAAGATGCCACAGTTCAGGCTGACATGAAACACTGGCCTTTTGAGGTAAATCAGTGATGGTGGAAAACCAAGATCAAGGTTGCA

91 K F E D A T V Q A D M K H W P F E V I S D G G K P K I K V A

361 TACAAGGGTGAAGACAAAACATTCTTCCAGAGGAAGTCAGTTCAATGGTATTAAACAAAATGAAAGAAACAGCTGAAGTTTACCTTGGC

121 Y K G E D K T F F P E E V S S M V L T K M K E T A E V Y L G

451 AAAACGGTGCAGATGCAGTAATTACAGTCCAGCATACTTTAATGACTCCCAAGACAGGCCACAAAAGATTCTGGTACAATCTCTGGT

151 K T V Q N A V I T V P A Y F N D S Q R Q A T K D S G T I S G

541 CTGAACGTTCTCCGAATCATCAATGAACCACTGCTGCTGCGATTGCATATGGTCTTGACAAGAAAGAGGTGGAGAACGTAACGCTCT

181 L N V L R I I N E P T A A A I A Y G L D K K G G G E R N V L

631 ATTTTCGATCTTGGCGGTGGTACTTTTGATGTATCCATCCTGACCATCGAGGATGATCTTTGAAGTGAAGTCCACTGCTGGAGACACT

211 I F D L G G G T F D V S I L T I E D G I F E V K S T A G D T

721 CACTTGGGAGGTGAGGACTTTGACAACCGCATGGTCAACCACTTTGTACAGGAGTTCAAGCGGAAGTACAAAAGGACATTTCTCCAC

241 H L G G E D F D N R M V N H F V Q E F K R K Y K K D I S S H

811 AAGAGGGCCCTGCGTAGGTGAGGACAGCTTGTGAGCGCCGAAGAGGACTCTTTCCTCGTCGACACAGGCTAGCATTTGAATCGACTCT

271 K R A L R R L R T A C E R A K R T L S S S T Q A S I E I D S

901 CTGTTTGAGGGTATCGATTACTACACATCCATCACCAGGGCGCGTTTCGAAGAACTGAACGCCGACTTATTAGATCTACCATGGAGCCT

301 L F E G I D Y Y T S I T R A R F E E L N A D L F R S T M E P

391 GTAGAGAAGTCCCTCCGTGACGCCAAGATGGACAAGCGCAAGTGCACGACATTGTCTCGTCGGAGGTTCACATCGTATCCCAAGAGTG

331 V E K S L R D A K M D K A Q V H D I V L V G G S T R I P R V

1081 CAGAAGCTCCTTCAAGACTTCTTCAATGGCAAGGAGTTGAACAAGTCCATCAACCCTGACGAGGCCGTAGCCTACGAGCGCGCTTCAG

361 Q K L L Q D F F N G K E L N K S I N P D E A V A Y G A A V Q

1171 GCCCGCATCTTGACGGTGATAAGTCTGAAGAAGTACAGGATCTGCTCTGTGGATGTGACCCCGCTGTCCCTCGGTATCGAGATGCA

391 A A I L H G D K S E E V Q D L L L L D V T P L S L G I E T A

1261 GCGGTGTCTATGACCACCTTGATTAAGCGTAACACGACCATCCCAAGCAACCCAGACTTTACGACCTATTCCGACAACCAACCC

421 G G V M T T L I K R N T T I P T K Q T Q T F T T Y S D N Q P

1351 GGTGTGCTTATTCAAGTATTGAGGGTGAGCGTGCCATGACCCGAGACAACAACCTTCTCGGTAATTTGAGCTCACTGGTATTCCTCCCA

451 G V L I Q V F E G E R A M T R D N N L L G K F E L T G I P P

1441 GCGCCCCGTGGTGTCCCAAAATCGAAGTTACTTTTCGACATTGACGCCAACGGTATCCTTAACGTATCGGCTGTGCAAAAATCTACCAAC

481 A P R G V P Q I E V T F D I D A N G I L N V S A V E K S T N

1531 AAGGAGAACAGATCAGGATCACCATGACAAGGGTCTGCTGTCCAAGAAGAGATCGAGCGTATGGTCAACGACGCTGAGAAATACAGG

511 K E N K I T I T N D K G R L S K E E I E R M V N D A E K Y R

1621 AACGAAGATGAGAAACAGAAGGAACCATTCAGGCTAAGAACCGCTCGAATCTTACTGCTTCAACATGAAGTCTACCATGGAGGATGAG

541 N E D E K Q K E T I Q A K N A L E S Y C F N M K S T M E D E

1711 AAGCTTAAGGACAAAATCACAGACTCCGACAAGCAAAATCATTTTGGACAAATGCAACGACACCATCAAAATGGTTGGACGCTAACCACTG

571 K L K D K I T D S D K Q I I L D K C N D T I K W L D A N Q L

1801 GCTGACAAGGAAGAATATGAGCACAAAGCAAGGAACGGAGGGTGTGTGCAACCCGATTATAACCAAGCTTTACCAGGGTGACGGTGA

601 A D K E E Y E H K Q K E L E G V C N P I I T K L Y Q G A G G

1891 GCCCCGAGGCGATGCCCGGTGGTATGCCAGGCTTCCCTGGCGGAGCGCTGGAGCCGGTGGAGCAGCCCTGGTGGCGGATCCCGACCC

631 A P G G M P G G M P G F P G G A P G A G A A P G G G S G P

1981 ACCATCGAAGAGGTTGATTAACTATTGAAATATACATTCCACTTTTCACATTGTAAGATCTTCTGATGTAATCTCTCAATTAATAA

661 T I E E V D

2071 ATGAATGCAACTGAAAAAAAAAAAAAAAAAAAAAAAAAAAAA

**Figure S1.** Nucleotide and deduced amino acid sequences of *PmHsc70*.



1 AGACTAATTCGAAATACGAGAGAGTGAACAAGTGATATTCAGTGAGAATCGAGGCATATTATACTATCTTGCGAATATTTCTGTGAAG  
 91 TTTGTTGAAGATTATATATTCAGTGATATTGTTTATCAGAAGACACAATGCCAGCTATTGGAATTGATCTTGGTACAACCTACTCTTGC  
 1 M P A I G I D L G T T Y S C  
 181 GTTGGTGTTTGGCAACATGGAATGTGGAGATCATCGCAAATGACCAGGGCAACCGAACACACCATCGTACGTTCGATTACGGACACG  
 31 V G V W Q H G N V E I I A N D Q G N R T T P S Y V A F T D T  
 271 GAGCGTCTGATCGGCGATGCTGCTAAGAACCAAGTAGCTTTAAACCCCTAGCAACACAGTGTTCGATGCGAAAAGGCTGATCGGCCGTAAA  
 61 E R L I G D A A K N Q V A L N P S N T V F D A K R L I G R K  
 361 TTCGACGATCCCAAAATTCACAGGACATGAAACATTGGCCTTTTAAAGTTATCAATGACTGCGGTAAGCCTAAGATCCAGGTTGAATTC  
 91 F D D P K I Q Q D M K H W P F K V I N D C G K P K I Q V E F  
 451 AAAGGCGAAACAAACGATTGCCCCAGAAGAAGTCAGCAGCATGGTTTGGTGAAAATGAAGGAGACAGCTGAGGCCTACCTTGGATCA  
 121 K G E T T K R F A P E E V S S M V L V K M K E T A E A Y L G S  
 541 TCAGTCGAGATGCGCTCGTCAGTGCCTGCTTTCATGATTTCACAGCGTCAGGCGACCAAGGATGCTGGGGTTATTGCTGGAATA  
 151 S V R D A V V T V P A Y F N D S Q R Q A T K D A G V I A G I  
 631 AATGTTTTACGTATCATAAACGAGCCACTGCCGTCTCTGGCATATGGCTAGACAAAAATCTAAAGGGCGAACGCAATGTCCTTAT  
 181 N V L R I I N E P T A A A L A Y G L D K N L K G E R N V L I  
 721 TTCGATCTTGGTGGCGGCACATTGACGTTTCCATTTTGACGATCGACGAGGGTTTCGCTTTTGAAGTGAAGGCCACGGCCGGAGACACA  
 211 F D L G G G T F D V S I L T I D E G S L F E V K A T A G D T  
 811 CACCTTGAGGTGAAGCTTTGACAACAGGCTCGTTAACCTAGCGGAGGAGTTCCAACGAAAATACAAGAAAGATTGGCCACGAAAC  
 241 H L G G E D F D N R L V N H L A E E F Q R K Y K K D L R T N  
 901 CCACGCGCATGGCGACCTCCGACCGCCGAGAGCGGCCAAGCGCACTTTATCATCTAGCACCGAGGCCACGGTTGAAATCGACGCG  
 271 P R A L R R L R T A A E R A K R T L S S S T E A T V E I D A  
 991 CTATACGAGGTATTGATTCTACACTCGCGTATCTCGGGCTCGGTTCAAGAATTAAACGCTGATCTATTCCGGGGCACCCCTCGAACCA  
 301 L Y E G I D F Y T R V S R A R F E E L N A D L F R G T L E P  
 1081 GTGGAAGAACGATGAAGATGCTAAGATGGATAAGAGCCAAATACATGACGTGGTTCTCGTCGGAGGGTCCACTCGTATTCCCTAAGGTA  
 331 V E K A L K D A K M D K S Q I H D V V L V G G S T R I P K V  
 1171 CAATCCCTGCTCAAAAACCTTCTCTGTGGTAAGAACTTAACTTTCCATCAACCCCGACGAGGCTGTAGCATATGGAGCGGGCGTCCAG  
 361 Q S L L Q N F F C G K K L N L S I N P D E A V A Y G A A V Q  
 1261 GCAGTATTTTGAAGCGGAACTCACTCTAAGATCCAGGATGTGTTATTGGTAGATGTAGCGCGCTGTCACTTGGCATAGAAATGCT  
 391 A A I L S G E T H S K I Q D V L L V D V A P L S L G I E T A  
 1351 GGAGGAGTCATGACCAAGATAATTGAACGTAACGTGCAAAATCCCGTGAAGCAATCGCAGACATTACCACTATTCTGACAACCGCCT  
 421 G G V M T K I I E R N C K I P C K Q S Q T F T T Y S D N Q P  
 1441 GCTGTAACTATCCAAGTGTATGAAGGTGAACGAGCAATGACAAAAGATAACAATCTCCTTGGTACTTTCGATCTGACAGGCATACCCT  
 451 A V T I Q V Y E G E R A M T K D N N L L G T F D L T G I P P  
 1531 GCACCGCGGGCGTGCCATAAATCGACGTCACATTCGACATGGACGCCAACGGTATTCTTAATGTCTCGGCAAGGAAAAACAGTACTGGT  
 481 A P R G V P K I D V T F D M D A N G I L N V S A K E N S T G  
 1621 CGTAGTAAAAATATCGTGATAAAGATGATAAGGACGTTTGTACAGGCTGAGATTGACAGAATGCTGGCAGAGGCTGAACGATACAAG  
 511 R S K N I V I K N D K G R L S Q A E I D R M L A E A E R Y K  
 1711 GAAGAGGATGATAAGCAGAGGGAGAGGGTGGCCGCTCGTAACCAACTGGAGACATATGTCTTCAGCGTGGACAGGCGCTAGATGATGCC  
 541 E E D D K Q R E R V A A R N Q L E T Y V F S V R Q A L D D A  
 1801 GGAGCGAAGTTACCAGACCAAGACAAAGATTCTGCACGATCACAATGCGACGAAGCGATAAAGTGGTTAGAGAACAACTTTGGCCGAG  
 571 G A K L P D Q D K D S A R S Q C D E A I K W L E N N T L A E  
 1891 AAGGAGGAATACGAGCATAAGTTGAAGGAGCTCCAGAGAGTTTGTCTACCCATTATGAGTAAGCTGCATGGTGTGGTGGTGGCCGCCCT  
 601 K E E Y E H K L K E L Q R V C S P I M S K L H G A G G A A P  
 1981 GGAGGCCAATCAATGGACCCACCGTAGAGGAAGTGGATTAAACCTAGTATTAAGAATAATAGTTATAATTATTTTAAAGACTGATTA  
 631 G G Q S N G P T V E E V D  
 2071 ATTTATTTGACTGCAGTGTTAAACATATGTTTAATAAACATTATTTAATTTAAAAA

**Figure S3.** Nucleotide and deduced amino acid sequences of *PmHsp70b*.

```

PmHSC70      : MTTKT PAVGIDLGTYSYCVGVFQY GKVEIIANDQGNRTTPSYVAFTDTERLIGDAAKNQVALN
XP_022130638.1 : MTTKT PAVGIDLGTYSYCVGVFQY GKVDIIANDQGNRTTPSYVAFTDTERLIGDAAKNQVALN
XP_041970467.1 : -MAKA PAVGIDLGTYSYCVGVFQH GKVEIIANDQGNRTTPSYVAFTDTERLIGDAAKNQVAMN
XP_026489199.1 : -MAKA PAVGIDLGTYSYCVGVFQH GKVEIIANDQGNRTTPSYVAFTDTERLIGDAAKNQVAMN
XP_028170304.1 : MATKA PAVGIDLGTYSYCVGVFQH GKVEIIANDQGNRTTPSYVAFTDTERLIGDAAKNQVAMN
               K PAVGIDLGTYSYCVGVFQ GKVEIIANDQGNRTTPSYVAFTDTERLIGDAAKNQVA6N

PmHSC70      : TAEVYLGKTVQNAVITVPAYFNDSQRQATKDS GTISGLNVLRIINEPTAAAIAYGLDKKGGGE
XP_022130638.1 : TAEVYLGKTVQNAVITVPAYFNDSQRQATKDS GTISGLNVLRIINEPTAAAIAYGLDKKGGGE
XP_041970467.1 : TAEVYLGKTVQNAVITVPAYFNDSQRQATKDS GTISGLNVLRIINEPTAAAIAYGLDKKGGGE
XP_026489199.1 : TAEVYLGKTVQNAVITVPAYFNDSQRQATKDA GTISGLNVLRIINEPTAAAIAYGLDKKGGTGE
XP_028170304.1 : TAEVYLGKTVQNAVITVPAYFNDSQRQATKDA GTISGLNVLRIINEPTAAAIAYGLDKKGGGE
               TAE YLGKTVQNAVITVPAYFNDSQRQATKD GTISGLN6LRIINEPTAAAIAYGLDKKGGGE

PmHSC70      : LRRRLTACERAKRTLSSSTQASIEIDSLFEGIDYYTSITRARFEELNADLFRSTMEPVEKSLR
XP_022130638.1 : LRRRLTACERAKRTLSSSTQASIEIDSLFEGIDYYTSITRARFEELNADLFRSTMEPVEKSLR
XP_041970467.1 : LRRRLTACERAKRTLSSSTQASIEIDSLFEGIDFYTSITRARFEELNADLFRSTMEPVEKSLR
XP_026489199.1 : LRRRLTACERAKRTLSSSTQASIEIDSLFEGIDFYTSITRARFEELNADLFRSTMEPVEKSLR
XP_028170304.1 : LRRRLTACERAKRTLSSSTQASIEIDSLYEGIDFYTSITRARFEELNADLFRSTMEPVEKSLR
               LRRRLTACERAKRTLSSSTQASIEIDSL5EGID5YTSITRARFEELNADLFRSTMEPVEKSLR

PmHSC70      : DLLLLDVTPSLSLGIETAGGVMTTLIKRNTTIPKQTQTFTTYSNQPVGVLIOVFEGERAMTRD
XP_022130638.1 : DLLLLDVTPSLSLGIETAGGVMTTLIKRNTTIPKQTQTFTTYSNQPVGVLIOVFEGERAMTRD
XP_041970467.1 : DLLLLDVTPSLSLGIETAGGVMTTLIKRNTTIPKQTQTFTTYSNQPVGVLIOVFEGERAMTKD
XP_026489199.1 : DLLLLDVTPSLSLGIETAGGVMTTLIKRNTTIPKQTQTFTTYSNQPVGVLIOVFEGERAMTKD
XP_028170304.1 : DLLLLDVTPSLSLGIETAGGVMTTLIKRNTTIPKQTQTFTTYSNQPVGVLIOVFEGERAMTKD
               DLLLLDVTPSLSLGIETAGGVMTTLIKRNTTIPKQTQTFTTYSNQPVGVLIOVFEGERAMT4D

PmHSC70      : NDAEKYRNEDKQKETIQAKNALESYCFNMKSTMEDEKLKDKITDSDKQIILDKCNDTIKWLE
XP_022130638.1 : NDAEKYRNEDKQKETIQAKNALESYCFNMKSTMEDEKLKDKITDSDKQIILDKCNDTIKWLE
XP_041970467.1 : NEAEKYRNEDKQKETIQAKNLESYCFNMKSTMEDEKLKDKITDSDKQIILDKCNDTIKWLE
XP_026489199.1 : NEAEKYRNEDKQKETIQAKNALESYCFNMKSTMEDEKLKDKITDSDKQIILDKCNDTIKWLE
XP_028170304.1 : NEAEKYRNEDKQKETIQAKNALESYCFNMKSTMEDEANLKDKITADKQIILDKCNDTIKWLE
               N AEKYRNEDKQKETIQAKNALESYCFNMKSTMEDEKLKDKIT3DSDKQ IILDKCNDTIKWLE

PmHSC70      : EVDD
XP_022130638.1 : EVD-
XP_041970467.1 : EVD-
XP_026489199.1 : EVD-
XP_028170304.1 : EVD-
               EVD

```

**Figure S4.** Sequence alignment of PmHSC70 with HSP70 proteins of *Pieris rapae* (XP\_022130638.1), *Aricia agestis* (XP\_041970467.1), *Vanessa tameamea* (XP\_026489199.1) and *Ostrinia furnacalis* (XP\_028170304.1).

```

PmHSP70a      : MPAIGIDLGTITYSCVGWQHGNVEIIANDQGNRTTPSYVAFDTERLIGDAAKNQVALNPNT
QWV59544.1    : MPAIGIDLGTITYSCVGWQHGNVEIIANDQGNRTTPSYVAFDTERLIGDAAKNQVALNPNT
XP_038210277.1 : MPAVGIDLGTITYSCVGWQHGNVEIIANDQGNRTTPSYVAFDTERLIGDAAKNQVALNPNT
KAG8115787.1  : MPAIGIDLGTITYSCVGWQHGNVEIIANDQGNRTTPSYVAFDTERLIGDAAKNQVALNPNT
XP_045456590.1 : MPAIGIDLGTITYSCVGWQHGNVEIIANDQGNRTTPSYVAFDTERLIGDAAKNQVALNPNT
                MPA6GIDLGTITYSCVGWQHGNVEIIANDQGNRTTPSYVAFDTERLIGDAAKNQVALNPNT

PmHSP70a      : YLGSSVRDAVITVPAYFNDSQRQATKDAGAIAGINVLRIINEPTAAALAYGLDKSLKGERNVL
QWV59544.1    : YLGSSVRDAVITVPAYFNDSQRQATKDAGAIAGINVLRIINEPTAAALAYGLDKSLKGERNVL
XP_038210277.1 : YLGSAVKDAVITVPAYFNDSQRQATKDAGAIAGINVLRIINEPTAAALAYGLDKDLKGERNVL
KAG8115787.1  : YLGTSVRDAVITVPAYFNDSQRQATKDAGAIAGINVLRIINEPTAAALAYGLDKNLKGERNVL
XP_045456590.1 : YLGTSVRDAVITVPAYFNDSQRQATKDAGAIAGINVLRIINEPTAAALAYGLDKNLKGERNVL
                YLG3sV4DAVITVPAYFNDSQRQATKDAGAIAG6NVLRIINEPTAAALAYGLDK LKGERNVL

PmHSP70a      : LRTAERAKRTLSSSTEATIEIDALYEGMDFYTRVSRARFEELNSDLFRGTLEPVEKALKDAK
QWV59544.1    : LRTAERAKRTLSSSTEATIEIDALYEGIDYTRVSRARFEELNSDLFRGTLEPVEKALKDAK
XP_038210277.1 : LRTAERAKRTLSSSTEATIEIDALYEGIDFYTRVSRARFEELNADLFRGTLEPVEKALKDAK
KAG8115787.1  : LRTAERAKRTLSSSTEATIEIDALYEGIDFYTRVSRARFEELNADLFRGTLEPVEKALKDAK
XP_045456590.1 : LRTAERAKRTLSSSTEATIEIDALYEGIDFYTRVSRARFEELNSDLFRGTLEPVEKALKDAK
                LRTAERAKRTLSSSTEATIEIDALYEG6D5YTRVSRARFEELN DLFRGTLEPVEKALKDAK

PmHSP70a      : LVDVAPLSLGIETAGGVMTKIIERNAKIPCRQSQTFTTYSNQPAVTIQVYEGERAMTKDNNL
QWV59544.1    : LVDVAPLSLGIETAGGVMTKIIERNAKIPCRQSQTFTTYSNQPAVTIQVYEGERAMTKDNNL
XP_038210277.1 : LVDVAPLSLGIETAGGVMTKIIERNAKIPCKQSQTFTTYSNQPAVTIQVYEGERAMTKDNNL
KAG8115787.1  : LVDVAPLSLGIETAGGVMTKIIERNAKIPCRQSQTFTTYSNQPAVTIQVYEGERAMTKDNNL
XP_045456590.1 : LVDVAPLSLGIETAGGVMTKIIERNCKIPCKQSQTFTTYSNQPAVTIQVYEGERAMTKDNNL
                LVDVAPLSLGIETAGGVMTKIIERNaKIPC4QSQTFTTYSNQPAVTIQVYEGERAMTKDNNL

PmHSP70a      : ERYKEEDNRQRERVASRNQLESYIFSVKQALDDAGEKLSQEEKNSARNA CDEALKWFENNTLA
QWV59544.1    : ERYKEEDNRQRERVATRQLESYIFSVKQALDDAGEKLGQEDKNTALNA CDEALKWFENNTLA
XP_038210277.1 : ERYKEEDSRQRERVAARNQLESYVFSVKQALDEAGEKIGQDDKDTARKACDDALKWLDNNTLA
KAG8115787.1  : ERYKEEDERQRQVARSARNQLESYIFSVKQALDDAGDKLSEQDKQTARNBCDEALKWLDNNTLA
XP_045456590.1 : ERYKEEDEKQRQRVAAARNQLESYVFSVRQALDDAGSKLSDEDKNTARNVCDEALQWLDNNTLA
                ERYKEED 4QR2RVa RNQLESY6FSV4QALDdAG K6 2dK 3Arn CDeAlkW NNTLA

PmHSP70a      : PTVEEVDD
QWV59544.1    : PTVEEVD-
XP_038210277.1 : PTVEEVD-
KAG8115787.1  : PTVEEVD-
XP_045456590.1 : PTVEEVD-
                PTVEEVDD

```

**Figure S5.** Sequence alignment of PmHSP70a with HSP70 proteins of *Pieris rapae* (QWV59544.1), *Zerene cesonia* (XP\_038210277.1), *Spodoptera frugiperda* (KAG8115787.1), and *Melitaea cinxia* (XP\_045456590.1) .



```

PmHSP70b      : MPAIGIDLGTTYSCVGVWQHGNVEIIANDQGNRTTPSYVAFDTERLIGDAAKNOVALNESNT
QWV59542.1    : MPAIGIDLGTTYSCVGVWQHGNVEIIANDQGNRTTPSYVAFDTERLIGDAAKNOVALNESNT
XP_045456597.1 : MPAIGIDLGTTYSCVGVWQHGNVEIIANDQGNRTTPSYVAFDTERLIGDAAKNOVALNESNT
XP_045456601.1 : MPAIGIDLGTTYSCVGVWQHGNVEIIANDQGNRTTPSYVAFDTERLIGDAAKNOVALNESNT
XP_039760955.1 : MPAIGIDLGTTYSCVGVWQHGNVEIIANDQGNRTTPSYVAFDTERLIGDAAKNOVALNESNT
                MPAIGIDLGTTYSCVGVWQHGNVEIIANDQGNRTTPSYVAFDTERLIGDAAKNOVALNP NT

PmHSP70b      : YLGSSVRDAVVTPPAYFNDSQRQATKDAGVIAGINVLRIINEPTAAALAYGLDKNLKGERNVL
QWV59542.1    : YLGSSVRDAVVTPPAYFNDSQRQATKDAGVIAGINVLRIINEPTAAALAYGLDKNLKGERNVL
XP_045456597.1 : YLGTSVRDAVITVPAYFNDSQRQATKDAGAIAGLNVLRINEPTAAALAYGLDKNLKGERNVL
XP_045456601.1 : YLGTSVRDAVITVPAYFNDSQRQATKDAGAIAGLNVLRINEPTAAALAYGLDKNLKGERNVL
XP_039760955.1 : YLGTSVVDVAVITVPAYFNDSQRQATKDAGAIAGLNVLRINEPTAAALAYGLDKNLKGERNVL
                YLG3SV4DAV6TVPAYFNDSQRQATKDAG IAG6NVLRINEPTAAALAYGLDKNLKGERNVL

PmHSP70b      : LRTAAERAKRTLSSSTEATVEIDALYEGIDFYTRVSRARFEELNADLFRGTLEPVEKALKDAK
QWV59542.1    : LRTAAERAKRTLSSSTEATVEIDALYEGIDFYTRVSRARFEELNADLFRGTLEPVEKALKDAK
XP_045456597.1 : LRTAAERAKRTLSSSTEATVEIDALYEGIDFYTRVSRARFEELNSDLFRGTLEPVEKALKDAK
XP_045456601.1 : LRTAAERAKRTLSSSTEATVEIDALYEGIDFYTRVSRARFEELNSDLFRGTLEPVEKALKDAK
XP_039760955.1 : LRTAAERAKRTLSSSTEATVEIDALYEGIDFYTRVSRARFEELNSDLFRGTLEPVEKALKDAK
                LRTAAERAKRTLSSSTEAT6EIDALYEGIDFYTRVSRARFEELN DLFRGTLEPVEKALKDAK

PmHSP70b      : LVDVAPLSLGIETAGGVMTKIIERNCKIPCKQSQTFTTYSNDQPAVTIQVYEGERAMTKDNNL
QWV59542.1    : LVDVAPLSLGIETAGGVMTKIIERNCKIPCKQSQTFTTYSNDQPAVTIQVYEGERAMTKDNNL
XP_045456597.1 : LVDVAPLSLGIETAGGVMTKIIERNCKIPCKQSQTFTTYSNDQPAVTIQVYEGERAMTKDNNL
XP_045456601.1 : LVDVAPLSLGIETAGGVMTKIIERNCKIPCKQSQTFTTYSNDQPAVTIQVYEGERAMTKDNNL
XP_039760955.1 : LVDVAPLSLGIETAGGVMTKIIERNCKIPCKQSQTFTTYSNDQPAVTIQVYEGERAMTKDNNL
                LVDVAPLSLGIETAGGVMTKIIERNCKIPCKQSQTFTTYSNDQPAVTIQVYEGERAMTKDNNL

PmHSP70b      : ERYKEEDDKQREHVAARNQLETYVFSVRQALDDAGAKLPDQDKDSARSHCDEAIKWLDNNTLA
QWV59542.1    : ERYKEEDDKQREHVAARNQLETYVFSVRQALDDAGAKLPDQDKDSARSHCDEAIKWLDNNTLA
XP_045456597.1 : ERYKEEDDKQRRQVVAARNQLESYVFSVRQALDDAGSKLSEEDKNTAFNVCEALQWLDNNTLA
XP_045456601.1 : ERYKEEDDKQRRQVVAARNQLESYVFSVRQALDDAGSKLSEEDKNTAFNVCEALQWLDNNTLA
XP_039760955.1 : ERYKEEDDKQRRQVVAARNQLESYVFSVRQALDDAGSKLSEEDKNTAFNVCEALQWLDNNTLA
                E4YKEED 4Qr 4VaARNQLE3Y6FSVRQALDDAG KL d DK13A4 CdEA6 WLdNNTLA

```

**Figure S6.** Sequence alignment of PmHSP70b with HSP70 proteins of *Pieris rapae* (QWV59542.1), *Melitaea cinxias* (XP\_045456597.1), *Melitaea cinxia* (XP\_045456601.1), and *Pararge aegeria* (XP\_039760955.1).
